# Supplementary material
Source: PubMed Central journal article supplement (PMC6073322)
Supplement: blood785253-suppl1.pdf [file blood785253-suppl1.pdf]

## SUPPLEMENTAL DATA

### **Shear-induced integrin signaling in platelet phosphatidylserine exposure, microvesicle release and coagulation**

*Short title:  $G_{\alpha_{13}}$  and integrin signaling facilitates clotting*

Aiming Pang<sup>\*1,6</sup>, Yujie Cui<sup>\*1,7</sup>, Yunfeng Chen<sup>2,4,#</sup>, Ni Cheng<sup>1</sup>, M. Keegan Delaney<sup>1,5</sup>,  
Minyi Gu<sup>5</sup>, Aleksandra Stojanovic-Terpo<sup>1</sup>, Cheng Zhu<sup>2,3,4</sup> and Xiaoping Du<sup>1</sup>

<sup>1</sup>Department of Pharmacology, University of Illinois at Chicago. Chicago, IL 60612, <sup>2</sup>Woodruff School of Mechanical Engineering, <sup>3</sup>Coulter Department of Biomedical Engineering, and <sup>4</sup>Petit Institute for Bioengineering and Biosciences, Georgia Institute of Technology, Atlanta, GA 30332, <sup>5</sup>Dupage Medical Tehcnology, Inc. Willowbrook, IL 60527, <sup>6</sup>Hematopoietic Stem Cell Transplantation Center, Institute of Hematology and Blood Diseases Hospital, Peking Union Medical College and Chinese Academy of Medical Sciences, Tianjin, China 300020, <sup>7</sup>School of Medical Laboratory, Tianjin Medical University, Tianjin, China 300203

\* Equal contribution first authors

#Current address: Department of Molecular and Experimental Medicine, The Scripps Research Institute, La Jolla, California 92037, USA

## **Supplemental Methods**

### ***Preparation of mouse platelets***

Eight- to 12-week-old mice were anesthetized with isoflurane, fresh blood was drawn from mouse inferior vena cava using ACD (85mM trisodium citrate, 83mM dextrose, and 21mM citric acid) as anticoagulant<sup>1,2</sup>. Blood from 5-6 mice of either genotype was pooled. After adding final concentrations of 1 U/mL apyrase and 0.1 µg/mL PGE1 to blood. Platelets were isolated and washed as described previously<sup>3</sup>, and resuspended in modified Tyrode's buffer<sup>4</sup> (12 mM NaHCO<sub>3</sub>, 138 mM NaCl, 5.5 mM glucose, 2.9 mM KCl, 0.42 mM NaH<sub>2</sub>PO<sub>4</sub>, 10 mM N-2-hydroxyethylpiperazine-N-2-ethanesulfonic acid (HEPES), pH 7.4, containing 1 mM CaCl<sub>2</sub> and 1 mM MgCl<sub>2</sub>), and allowed to rest for at least 1 hour at room temperature before use.

### ***Peptide micellar formulation.***

As previously described<sup>5</sup>, PEG2000-DSPE (Avanti Polar Lipids Inc. Alabaster, AL), L-α-phosphatidylcholine (egg PC, Type XI-E, Sigma-Aldrich, St. Louis, MO), and peptides were mixed in methanol, and allowed to form a dry thin film using a rotary evaporator (Buchi, Rotavapor R-215). The dry thin film was rehydrated to form micellar nanoparticles in 0.15M NaCl as previously described<sup>5</sup>.

### ***Preparation for Dual biomembrane force probe assay***

Following an Institutional Review Board approved protocol at Georgia Tech, 8-10  $\mu\text{L}$  of human blood was collected from finger prick and centrifuged to isolate RBCs. The RBCs were biotinylated by incubating with Biotin-PEG3500-NHS (JenKem) solution<sup>6-8</sup>, and swollen by incubating with nystatin (Sigma-Aldrich)<sup>6,8</sup>. Glass beads (DistriLab Particle Technology) were thiolated and incubated with Streptavidin–Maleimide (SA-MAL) overnight, washed with and resuspended in phosphate buffer (27.6 g/L  $\text{NaH}_2\text{PO}_4 \cdot \text{H}_2\text{O}$ , 28.4 g/L  $\text{Na}_2\text{HPO}_4$ ) to make SA beads. To make FN or Annexin V beads, the SA beads were further incubated with soluble biotinylated FN (a gift from Dr. Andres Garcia, Georgia Tech) or Annexin V (BD Biosciences, CA) for 3 hours, washed with and resuspended in phosphate buffer.

### ***Bone marrow transplantation***

As described in our previous publications<sup>5,9</sup>, bone marrow stem cells were isolated from femur and tibiae of 8-week-old Integrin  $\beta_3^{-/-}$  mice using the MACS lineage cell depletion kit (Miltenyi Biotec, Germany). Stem cells were subsequently infected twice with concentrated lenti-virus containing shRNA or cDNA constructs to be transfected with wild-type or AAA mutant  $\beta_3$  as described previously<sup>5</sup>. The recipient Integrin  $\beta_3^{-/-}$  mice were irradiated for 5Gy. The transfected stem cells were retro-orbitally injected with 27 1/2G needle's syringe into recipient mice ( $1 \times 10^6$  cells per recipient mouse) 24 hours after irradiation. Retro-orbital injection provides similar haematopoietic reconstitution as compared to IV injection<sup>10</sup>.

### ***Flow cytometric analysis of platelet-derived MV.***

Platelet MV release and PS exposure were analyzed by flow cytometry as described previously<sup>11</sup>. Washed human platelets with or without thrombin stimulation were subjected to shear. The platelets were then labeled with phycoerythrin (PE)-conjugated IgG control or anti-integrin  $\alpha_{IIb}$  antibody and analyzed via flow cytometry to determine whether the MV were derived from platelets. The MV and platelets were distinguished according to their light scattering pattern as previously described<sup>12,13</sup>.

### ***Recalcification time***

Human platelet-rich plasma (PRP) and platelet-poor plasma (PPP) were isolated from blood anti-coagulated with 1/10 volume of 3.8% citrate<sup>11</sup>. Recalcification time of citrated PRP was the time from addition of 20 mM  $\text{CaCl}_2$  to the formation of a fibrin clot, which was monitored either in a cone-and-plate rheometer (Thermo Scientific Haake) or a turbidometric lumi-aggregometer (Chrono-Log) as described previously<sup>11</sup>. For the cone-and-plate rheometer method, 150  $\mu\text{L}$  of mice platelet suspension in human PRP was pipetted onto a 60 x 15mm polystyrene dish and 6000  $\text{s}^{-1}$  shear was applied at 37°C. Coagulation was indicated by a sharp increase in viscosity. The test was stopped for samples that failed to coagulate after 1 hour. For the turbidometric aggregometer method, PRP was used as the baseline reference (100% light transmittance). Clotting

was detected by turbidity change following addition of 20 mM CaCl<sub>2</sub> at 37°C with stirring (1200 rpm).

### ***Laser-induced mouse arteriolar thrombosis model and fluorescence intravital microscopy***

As described previously<sup>14</sup>, Male C57BL/6 mice (6–8 weeks old) were anesthetized with intraperitoneal injection of ketamine and xylazine, and placed on a thermo-controlled blanket (37°C). The mouse cremaster muscle was exteriorized and superfused with thermo-controlled (37°C) bicarbonate-buffered saline for the duration of experiments.

After infusion of DyLight 649-labeled anti-mouse GPIIb/IIIa and Alexa Fluor (AF) 488–labeled monoclonal anti-fibrin antibody (clone 59D8, provided by Dr. Hartmut Weiler, The Blood Research Institute, Milwaukee, WI) into mice, platelet and fibrin accumulation around the site of injury was visualized following laser-induced injury to cremaster arterioles<sup>15</sup>.

## **REFERENCES**

1. Li Z, Zhang G, Le Breton GC, Gao X, Malik AB, Du X. Two waves of platelet secretion induced by thromboxane A<sub>2</sub> receptor and a critical role for phosphoinositide 3-kinases. *J Biol Chem*. 2003;278(33):30725-30731.
2. Estevez B, Kim K, Delaney MK, et al. Signaling-mediated cooperativity between glycoprotein Ib-IX and protease-activated receptors in thrombin-induced platelet activation. *Blood*. 2016;127(5):626-636.
3. Marjanovic JA, Li Z, Stojanovic A, Du X. Stimulatory roles of nitric-oxide synthase 3 and guanylyl cyclase in platelet activation. *J Biol Chem*. 2005;280(45):37430-37438.
4. Flevaris P, Stojanovic A, Gong H, Chishti A, Welch E, Du X. A molecular switch that controls cell spreading and retraction. *J Cell Biol*. 2007;179(3):553-565.

5. Shen B, Zhao X, O'Brien KA, et al. A directional switch of integrin signalling and a new anti-thrombotic strategy. *Nature*. 2013;503(7474):131-135.
6. Chen Y, Liu B, Ju L, et al. Fluorescence Biomembrane Force Probe: Concurrent Quantitation of Receptor-ligand Kinetics and Binding-induced Intracellular Signaling on a Single Cell. *J Vis Exp*. 2015(102):e52975.
7. Rosetti F, Chen Y, Sen M, et al. A Lupus-Associated Mac-1 Variant Has Defects in Integrin Allostery and Interaction with Ligands under Force. *Cell Rep*. 2015.
8. Ju L, Chen Y, Li K, et al. Dual Biomembrane Force Probe enables single-cell mechanical analysis of signal crosstalk between multiple molecular species. *Sci Rep*. 2017;7(1):14185.
9. Gong H, Shen B, Flevaris P, et al. G protein subunit Galpha13 binds to integrin alphallbbeta3 and mediates integrin "outside-in" signaling. *Science*. 2010;327(5963):340-343.
10. Leon-Rico D, Fernandez-Garcia M, Aldea M, et al. Comparison of haematopoietic stem cell engraftment through the retro-orbital venous sinus and the lateral vein: alternative routes for bone marrow transplantation in mice. *Lab Anim*. 2015;49(2):132-141.
11. Delaney MK, Liu J, Kim K, et al. Agonist-induced platelet procoagulant activity requires shear and a Rac1-dependent signaling mechanism. *Blood*. 2014;124(12):1957-1967.
12. Boilard E, Nigrovic PA, Larabee K, et al. Platelets amplify inflammation in arthritis via collagen-dependent microparticle production. *Science*. 2010;327(5965):580-583.
13. Lacroix R, Robert S, Poncelet P, et al. Standardization of platelet-derived microparticle enumeration by flow cytometry with calibrated beads: results of the International Society on Thrombosis and Haemostasis SSC Collaborative workshop. *J Thromb Haemost*. 2010;8(11):2571-2574.
14. Cho J, Kennedy DR, Lin L, et al. Protein disulfide isomerase capture during thrombus formation in vivo depends on the presence of beta3 integrins. *Blood*. 2012;120(3):647-655.
15. Atkinson BT, Jasuja R, Chen VM, Nandivada P, Furie B, Furie BC. Laser-induced endothelial cell activation supports fibrin formation. *Blood*. 2010;116(22):4675-4683.

## Supplemental Figures

Supplemental Figure 1. An illustration of the biomembrane dual force probe (BFP) analysis of integrin- and outside-in signaling-dependent transduction of mechanical force leading to PS exposure.

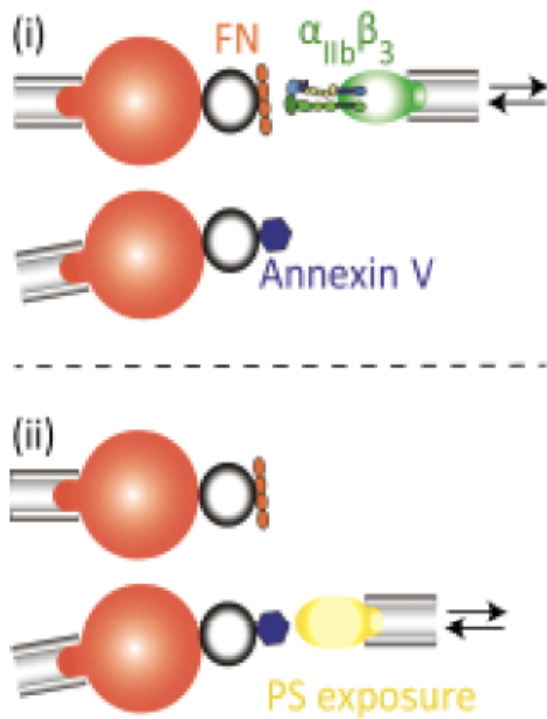

**Supplemental Figure 2. Staining platelets and platelet-derived MVs with a**

**platelet-specific marker.** Washed human platelets with or without thrombin stimulation

were subjected to shear. The platelets were then labeled with phycoerythrin (PE)

conjugated IgG control or anti- integrin  $\alpha_{IIb}$  antibody and analyzed via flow cytometry for

MV release and expression of  $\alpha_{IIb}$ . (A) Cytograms showing size vs fluorescence. (B)

Quantification of the percent of platelets or platelet-derived MVs that were positive for  $\alpha_{IIb}$

staining.

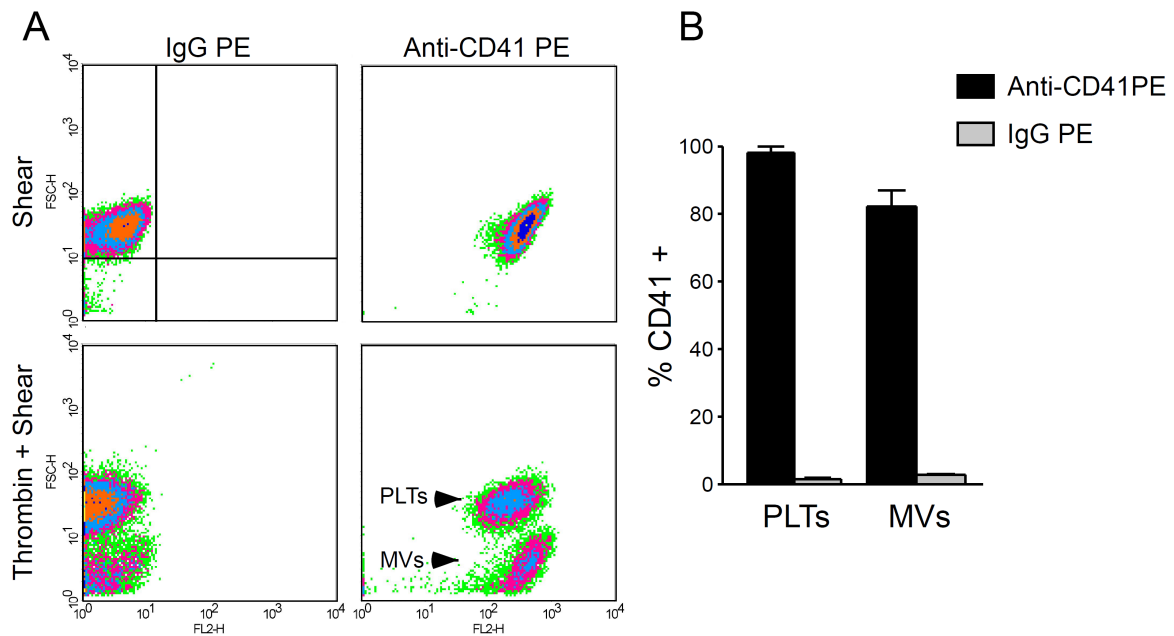



**Supplemental Figure 3. ADP or TXA2 alone does not induce PS exposure or MV**

**release in the presence of shear.** Washed mouse platelets were subjected to shear

alone, or stimulated with 20  $\mu$ M ADP or 1  $\mu$ M U46619 and subjected to shear (3000/sec).

The platelets were then labeled with Annexin V and analyzed via flow cytometry for MV

release and PS exposure. (A) SSC vs FSC cytograms. (B) Fluorescence histograms of

Annexin V binding.

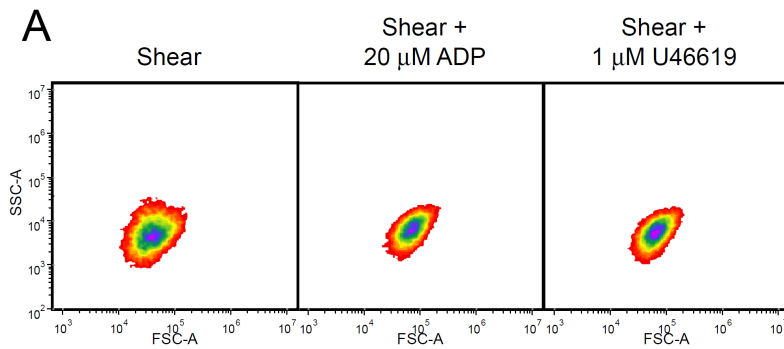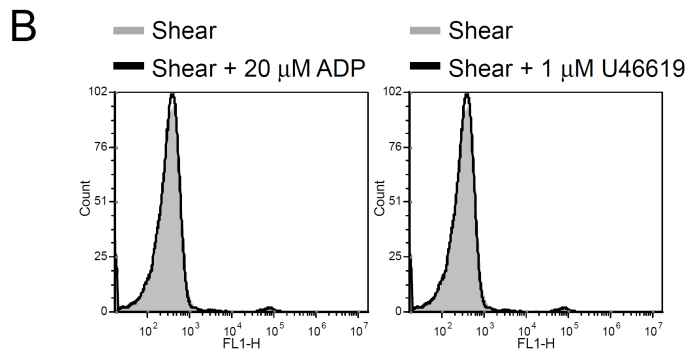

**Supplemental videos for Figure 6:**

Supplemental video 1: Saline control

Supplemental video 2: Scrambled peptide

Supplemental video 3: mP6

**Supplemental videos for Figure 7:**

Supplemental video 4:  $G\alpha 13^{fl/fl}$  control mice

Supplemental video 5:  $G\alpha 13^{fl/fl-PF4cre}$  (platelet specific  $G\alpha 13$  knockout mice)
